# Supplementary material for: Towards a Better Knowledge of Natural Methane Releases in the French Alps: A Field Approach
Source: Hindawi journal article supplement (doi:10.1155/2019/6487162), 2019-06-10
Supplement: f1 [file 6487162.f1.xlsx]

## Sheet: soil-gas-flux
Point number	longitude (°E)	latitude (°N)	Date/Time	CO2 flux (g/m²/h)	CH4 flux (g/m²/h)	O2 decrease (g/m²/h)
JON1	5.22833	44.2928	2017-09-04 15:47:18	0.192022
JON2	5.22843	44.2929	2017-09-04 15:54:16	0.317306
JON3	5.22851	44.2929	2017-09-04 15:59:46	0.769194		-4.07766
JON4	5.22844	44.293	2017-09-04 16:05:23	0.397941		-4.20351
JON5	5.22836	44.293	2017-09-04 16:10:40	0.379129		-4.12708
JON6	5.22836	44.293	2017-09-04 16:16:23	0.131152
JON7	5.2283	44.293	2017-09-04 16:21:11	0.312768
JON8	5.22824	44.293	2017-09-04 16:27:44	1.2842
JON9	5.22805	44.293	2017-09-04 16:33:33	1.39061
JON10	5.22804	44.2929	2017-09-04 16:39:42	0.404438
JON11	5.22806	44.2931	2017-09-04 16:47:42	1.22793
JON12	5.22808	44.2931	2017-09-04 16:53:45	0.801567
JON13	5.22814	44.2931	2017-09-04 16:59:03	0.703318
JON14	5.22818	44.2931	2017-09-04 17:07:30	0.910939
JON15	5.22793	44.293	2017-09-04 17:16:15	0.580254
JON16	5.22838	44.2931	2017-09-04 17:23:46	1.11167
JON17	5.22834	44.2932	2017-09-04 17:30:28	2.00928
JON18	5.22824	44.2931	2017-09-04 17:38:34	1.01696
JON19	5.22785	44.2928	2017-09-05 09:20:27	0.640451
JON20	5.2278	44.293	2017-09-05 09:25:48	0.669671
JON21	5.22769	44.2932	2017-09-05 09:31:16	2.34316
JON22	5.22779	44.2933	2017-09-05 09:36:38	0.623825
JON23	5.22799	44.2933	2017-09-05 09:42:39	1.0915
JON24	5.22819	44.2932	2017-09-05 09:49:28	0.859004
JON25	5.22827	44.2931	2017-09-05 09:58:04	1.22096
JON26	5.2282	44.2931	2017-09-05 10:03:39	0.844647
JON27	5.22816	44.293	2017-09-05 10:09:51	0.396494
MG1	5.41602	44.7273	2017-09-05 15:42:31	0.611754		-3.68091
MG2	5.41657	44.7269	2017-09-05 15:52:13	0.346594
MG3	5.4171	44.7269	2017-09-05 16:01:11	1.28748
MG4	5.4178	44.7265	2017-09-05 16:09:32	1.2057
MG5	5.41866	44.7272	2017-09-05 16:26:17	0.187318		-7.52452
MG6	5.41858	44.7272	2017-09-05 16:32:00	2.2802	220.792	-92.5229
MG7	5.41864	44.7274	2017-09-05 16:42:12	0.648076
MG8	5.41928	44.7268	2017-09-05 17:03:31	0.401559
MG9	5.41858	44.7272	2017-09-06 09:04:44	2.25466	181.801	-105.343
MG10	5.41864	44.7272	2017-09-06 09:29:55	0.577477
MG11	5.41859	44.7272	2017-09-06 09:36:31	0.792137
MG12	5.41845	44.7272	2017-09-06 09:43:24	0.316564
MG13	5.41858	44.7272	2017-09-06 09:57:38	1.57533	119.099	-64.7661
MG14	5.41858	44.7272	2017-09-06 10:06:09	0.515153	28.6552	-12.3813
MG15	5.41858	44.7272	2017-09-06 10:12:57	2.11564	204.355	-101.225
ROC1	5.77644	45.2329	2017-09-06 14:44:25	0.271383	0.0741923
ROC2	5.77637	45.2329	2017-09-06 14:54:20	1.74256	30.9019	-11.9468
ROC3	5.77638	45.2329	2017-09-06 15:18:25	0.673568	10.3184	-4.42188
ROC4	5.77638	45.2329	2017-09-06 15:25:10	0.166229
ROC5	5.7764	45.2329	2017-09-06 15:35:45	0.673658	0.406422
ROC6	5.77641	45.2329	2017-09-06 15:41:52	0.199198	0.141549
ROC7	5.77642	45.2329	2017-09-06 15:47:30	0.881593	0.0397331
ROC8	5.77641	45.2329	2017-09-06 15:53:22	0.158282	0.127034
ROC9	5.77642	45.2329	2017-09-06 15:59:42	1.17236	4.11237	-4.42188
ROC10	5.77642	45.2329	2017-09-06 16:05:40	0.305917	0.202503
ROC11	5.77642	45.2329	2017-09-06 16:10:56	4.09793	0.829171
ROC12	5.77643	45.2329	2017-09-06 16:17:18	0.536518	0.0300612
ROC13	5.77645	45.2329	2017-09-06 16:24:16	3.30488
ROC14	5.77645	45.2329	2017-09-06 16:30:01	1.28962	0.178799
ROC15	5.77645	45.2329	2017-09-06 16:36:12	4.22955
ROC16	5.77649	45.2329	2017-09-06 16:43:28	2.85215
ROC17	5.77639	45.2329	2017-09-06 16:51:07	2.64233	1.00781
ROC18	5.77637	45.2329	2017-09-06 16:57:21	1.07588	0.507816
ROC19bis	5.77638	45.2329	2017-09-06 17:10:10	1.59176	0.237252
ROC20	5.77637	45.2329	2017-09-06 17:18:20	2.31943	54.0943	-16.6541
ROC21	5.77639	45.2328	2017-09-06 17:25:42	1.57054	0.106595
ROC22	5.77637	45.2328	2017-09-06 17:33:04	1.06987	1.77604	-4.53979
ROC23	5.77636	45.2329	2017-09-06 17:39:44	0.189411	0.0489568
CLU1	6.57468	46.0916	2017-09-07 11:52:28	0.584271		-6.72009
CLU2	6.5746	46.0916	2017-09-07 11:57:08	0.83989		-8.56565
CLU3	6.57453	46.0916	2017-09-07 12:02:38	1.29436		-5.12007
CLU4	6.57476	46.0917	2017-09-07 12:08:14	0.670321
CLU5	6.5746	46.0917	2017-09-07 12:13:05	0.675888
CLU6	6.57441	46.0918	2017-09-07 12:18:08	0.453653
CLU7	6.58717	46.0848	2017-09-07 13:23:40	0.819035		-6.90171
CLU8	6.58726	46.0848	2017-09-07 13:28:41	0.49479
CLU9	6.58733	46.0848	2017-09-07 13:33:05	0.307611
CLU10	6.58711	46.0848	2017-09-07 13:38:30	0.529861
CLU11	6.587	46.0847	2017-09-07 13:50:48	2.88855	0.3684	-6.0441
CLU12	6.587	46.0847	2017-09-07 13:57:06	0.364269
CLU13	6.587	46.0847	2017-09-07 14:02:08	0.54319
CLU14	6.587	46.0846	2017-09-07 14:06:24	0.494187
CLU15	6.58699	46.0846	2017-09-07 14:11:06	1.25894		-5.72243
CLU16	6.58698	46.0846	2017-09-07 14:15:50	1.33419		-5.40451
CLU17	6.58698	46.0846	2017-09-07 14:21:12	0.431317
CLU18	6.58698	46.0847	2017-09-07 14:25:46	0.389414
CLU19	6.58698	46.0847	2017-09-07 14:31:18	0.532629
CLU20	6.58702	46.0847	2017-09-07 14:36:11	0.218405
CLU21	6.58702	46.0847	2017-09-07 14:40:35	1.1654
CLU22	6.58702	46.0846	2017-09-07 14:46:20	6.20788	0.2043	-13.6976
CLU23	6.58702	46.0846	2017-09-07 14:50:28	1.10514		-5.83688
CLU24	6.58705	46.0846	2017-09-07 14:54:54	1.58235		-6.34443
CLU25	6.58705	46.0846	2017-09-07 14:59:42	0.976765		-3.86914
CLU26	6.58703	46.0846	2017-09-07 15:04:11	1.76934		-6.85539
CLU27	6.58704	46.0846	2017-09-07 15:09:05	0.858971
CLU28	6.58702	46.0846	2017-09-07 15:14:18	3.32176	4.56341	-9.26488
CLU29	6.58701	46.0846	2017-09-07 15:20:00	1.52886		-4.20351
CLU30	6.58701	46.0846	2017-09-07 15:24:31	1.55993		-8.10677
CLU31	6.58702	46.0846	2017-09-07 15:34:26	1.4667		-1.34402
CLU32	6.587	46.0847	2017-09-07 15:42:17	0.762321
CLU33	6.58699	46.0847	2017-09-07 15:52:44	0.597663
CLU34	6.587	46.0847	2017-09-07 15:58:32	0.790157
CLU35	6.58701	46.0847	2017-09-07 16:03:35	5.412		-6.99626
CLU36	6.58701	46.0847	2017-09-07 16:08:00	2.11534
CLU37	6.58701	46.0847	2017-09-07 16:16:58	0.701911
CLU38	6.587	46.0847	2017-09-07 16:22:42	0.646256
CLU39	6.58699	46.0847	2017-09-07 16:27:45	0.722339
CLU40	6.58701	46.0847	2017-09-07 16:34:22	2.56541	0.628279	-5.23822

## Sheet: soil-gas-concentrations
Point number	longitude (°E)	latitude (°N)	Date/Time	O2 (%) LFG20	CH4 (%) LFG20	CO2 (%) LFG20
JON1	5.22833	44.2928	2017-09-05 11:25:00	19.9	0	1.42
JON2	5.22843	44.2929	2017-09-05 11:19:00	20	0	1.54
JON3	5.22851	44.2929	2017-09-05 11:22:00	20.1	0	1.26
JON5	5.22836	44.293	2017-09-05 11:13:00	19.8	0	1.53
JON6	5.22836	44.293	2017-09-05 11:17:00	20	0	1.26
JON9	5.22805	44.293	2017-09-05 10:55:00	19.6	0	2.05
JON10	5.22804	44.2929	2017-09-05 10:58:00	20.2	0	0.96
JON11	5.22806	44.2931	2017-09-05 10:52:00	19.7	0	1.71
JON12	5.22808	44.2931	2017-09-05 10:48:00	20.3	0	0.88
JON13	5.22814	44.2931	2017-09-05 10:38:00	19.7	0	1.7
JON14	5.22818	44.2931	2017-09-05 11:07:00	20	0	1.11
JON17	5.22834	44.2932	2017-09-05 10:42:00	20.2	0	1.34
JON26	5.2282	44.2931	2017-09-05 10:34:00	20.8	0	0.2
JON27	5.22816	44.293	2017-09-05 11:03:00	20.1	0	1.07
JON SEEP	5.23642	44.2906	2018-10-05 10:00:00	0	87.1	1.63
MG9	5.41858	44.7272	2017-09-06 10:40:00	0	95	0.4
CLU11	6.587	46.0847	2017-09-07 15:46:00	0	78.5	8.2
CLU28	6.58702	46.0846	2017-09-07 15:30:00	0	55.8	11
CLU33	6.58699	46.0847	2017-09-07 16:22:00	19.3	0	2.72
CLU34	6.587	46.0847	2017-09-07 16:14:00	7.6	12.1	11.6
CLU35	6.58701	46.0847	2017-09-07 16:10:00	0.7	16.4	14.4
CLU36	6.58701	46.0847	2017-09-07 16:16:00	2.5	3.48	18.5
CLU37	6.58701	46.0847	2017-09-07 16:18:00	18	0	4.15
CLU38	6.587	46.0847	2017-09-07 16:20:00	18.5	0	3.72
CLU39	6.58699	46.0847	2017-09-07 16:25:00	12.1	0	9.7
CLU40	6.58701	46.0847	2017-09-07 16:33:00	3.7	51.5	9.4
